# Supplementary material for: Tandem allylic substitution–5-exo-dig-carbocyclization: a [4 + 1]-annulation approach to arylidene cyclopentenes from MBH-acetates of acetylenic aldehydes
Source: Royal Society of Chemistry journal article supplement (doi:10.1039/c2ob26934a), 2012-01-01

# **Tandem allylic Substitution / Conia-ene reaction: A [4+1]- annulation approach to cyclopentenones from MBH-acetates of acetylenic aldehydes**

Chada Raji Reddy,\* Paridala Kumaraswamy and Motatipally Damoder Reddy

Division of Natural Products Chemistry, CSIR-Indian Institute of Chemical Technology, Hyderabad-  
500607

E-mail: [rajireddy@iict.res.in](mailto:rajireddy@iict.res.in)

## **Contents**

**S2-S41 - Copies of <sup>1</sup>H and <sup>13</sup>C NMR spectra**

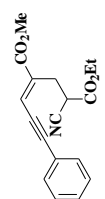

3a'

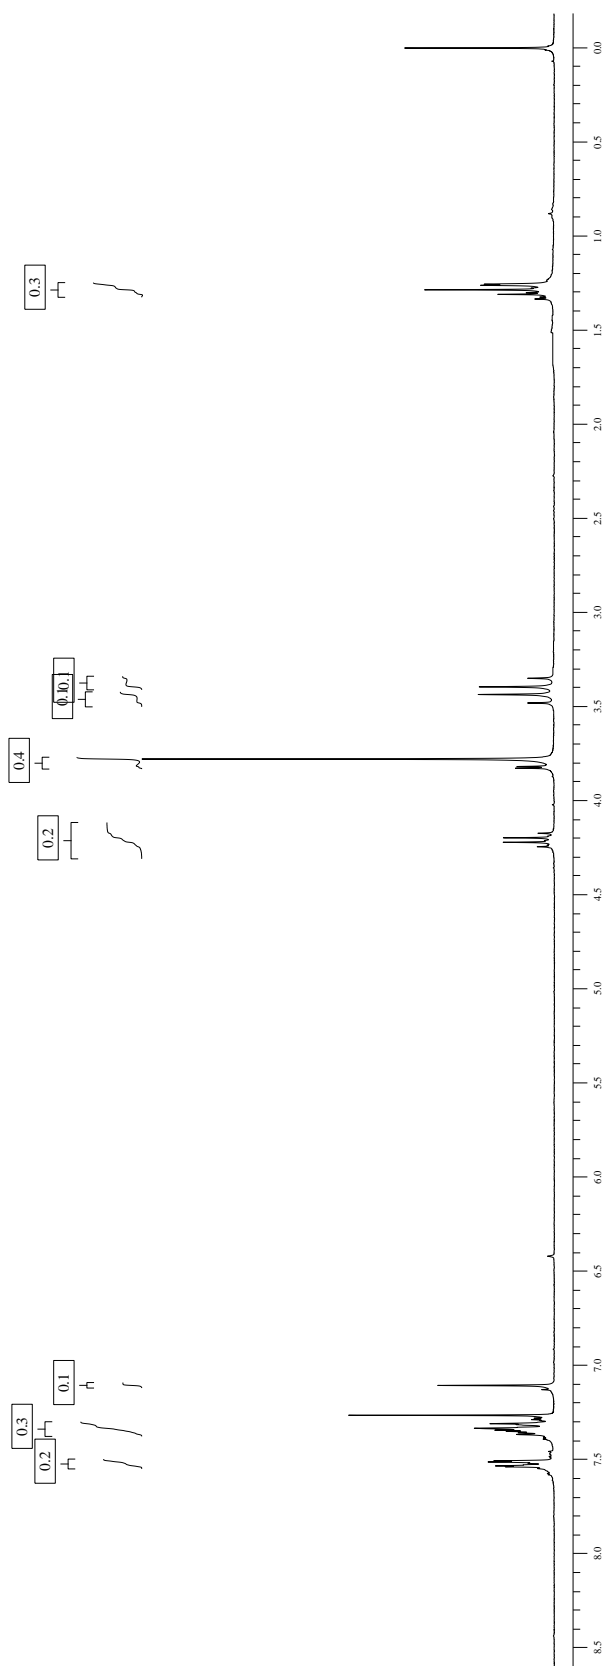

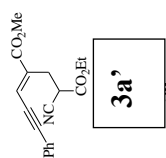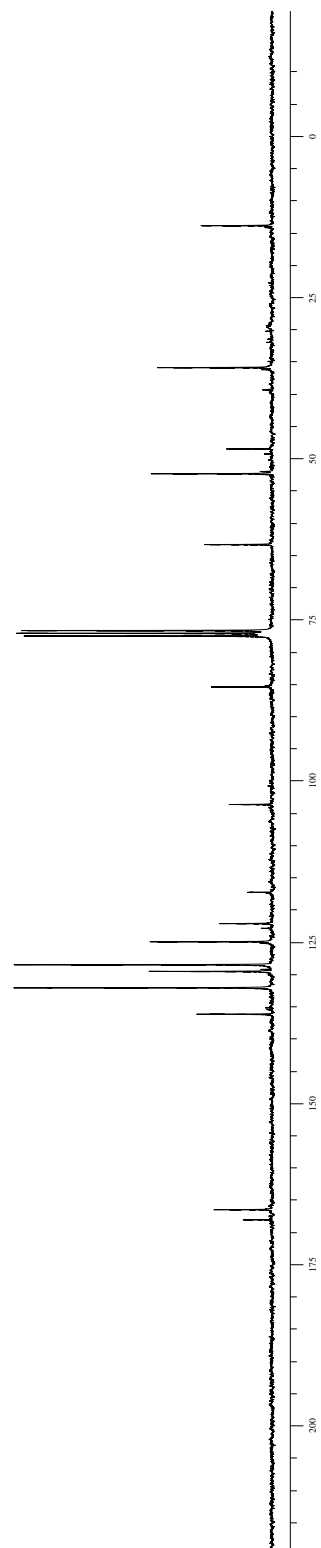

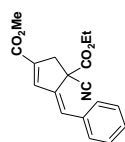

3a

3a

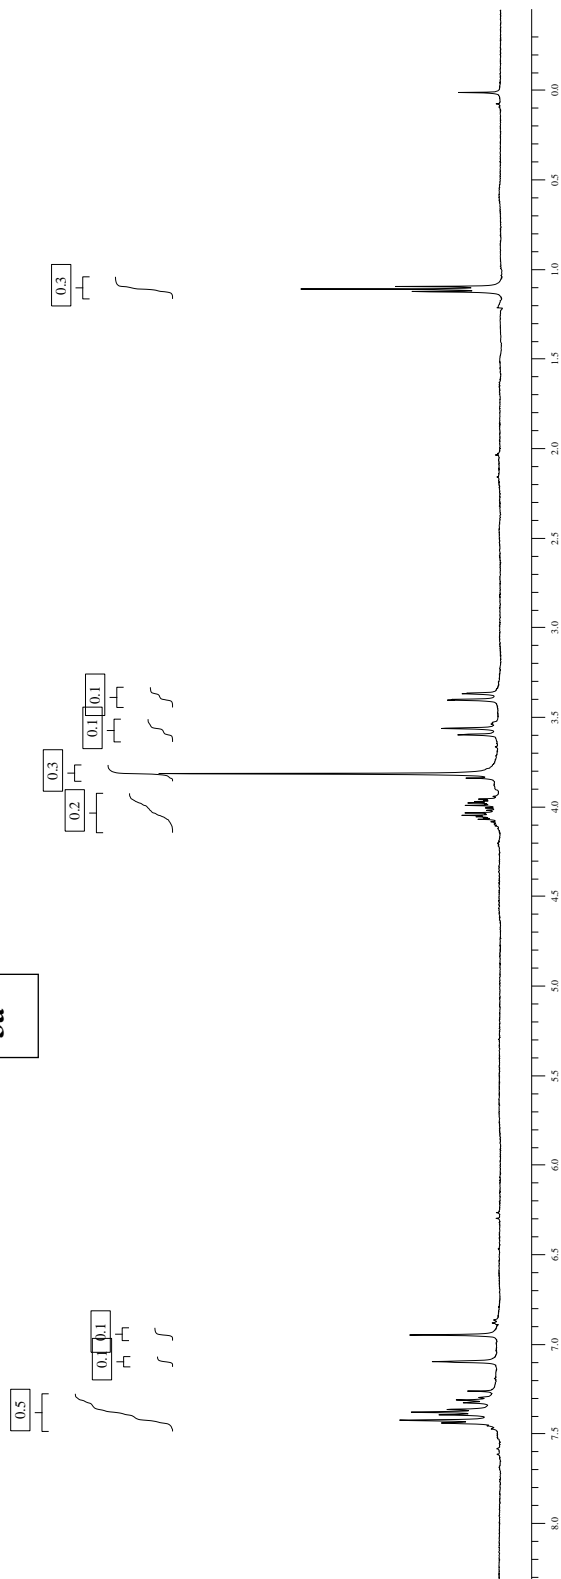

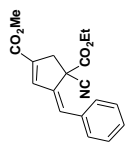

**3a**

**3a**

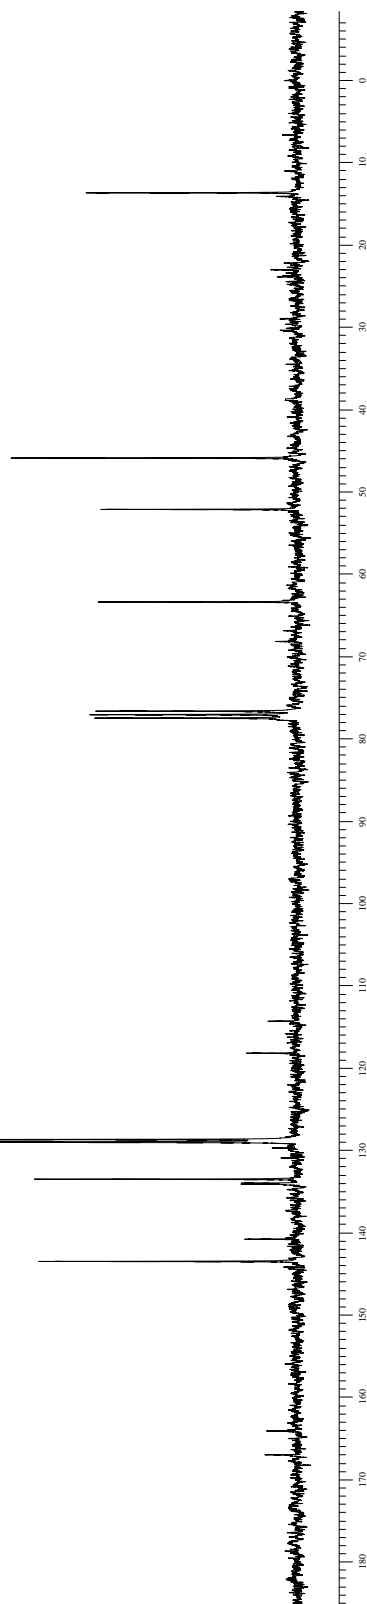

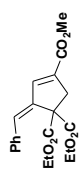

**3b**

**3b**

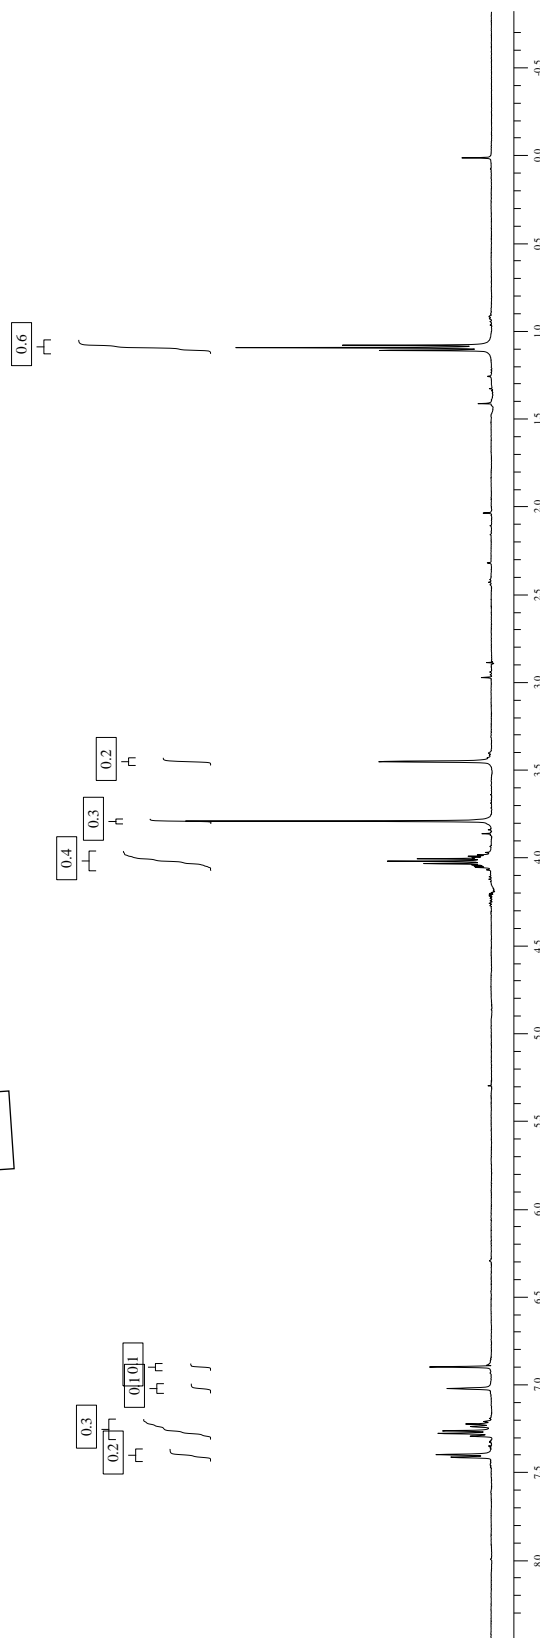

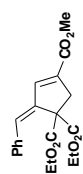

3b

3b

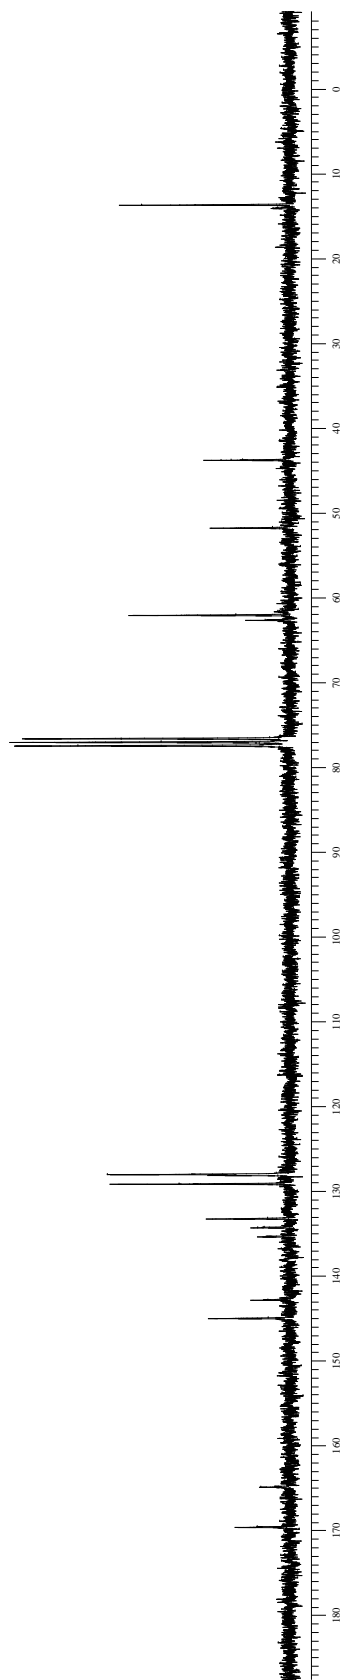

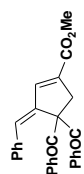

3c

3c

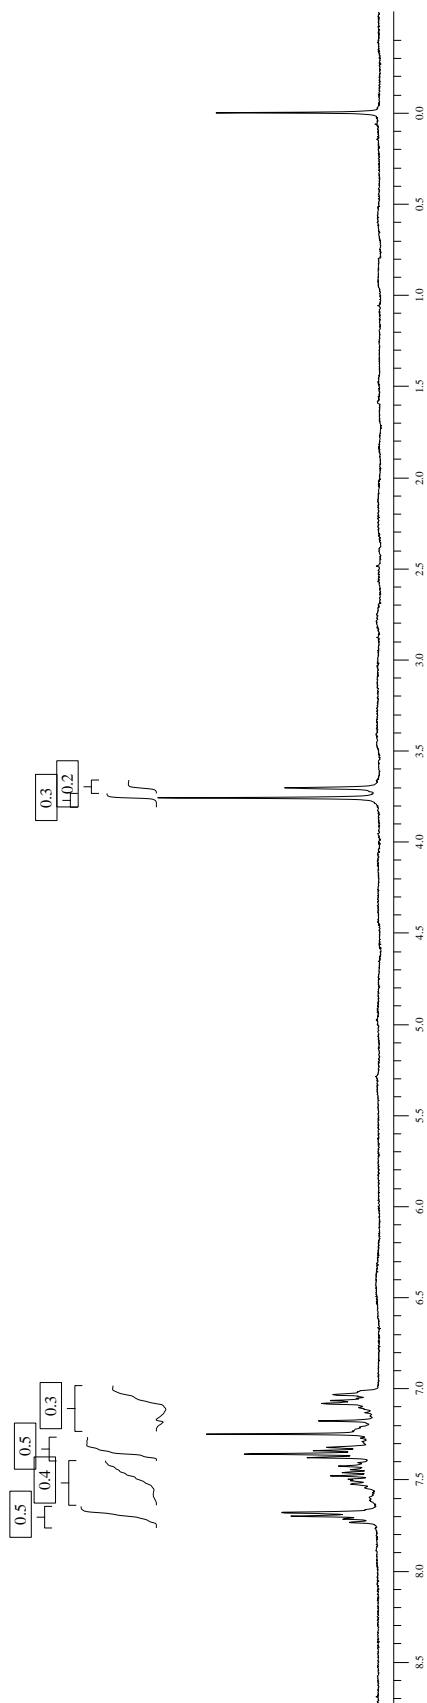



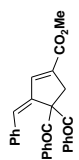

3c

3c

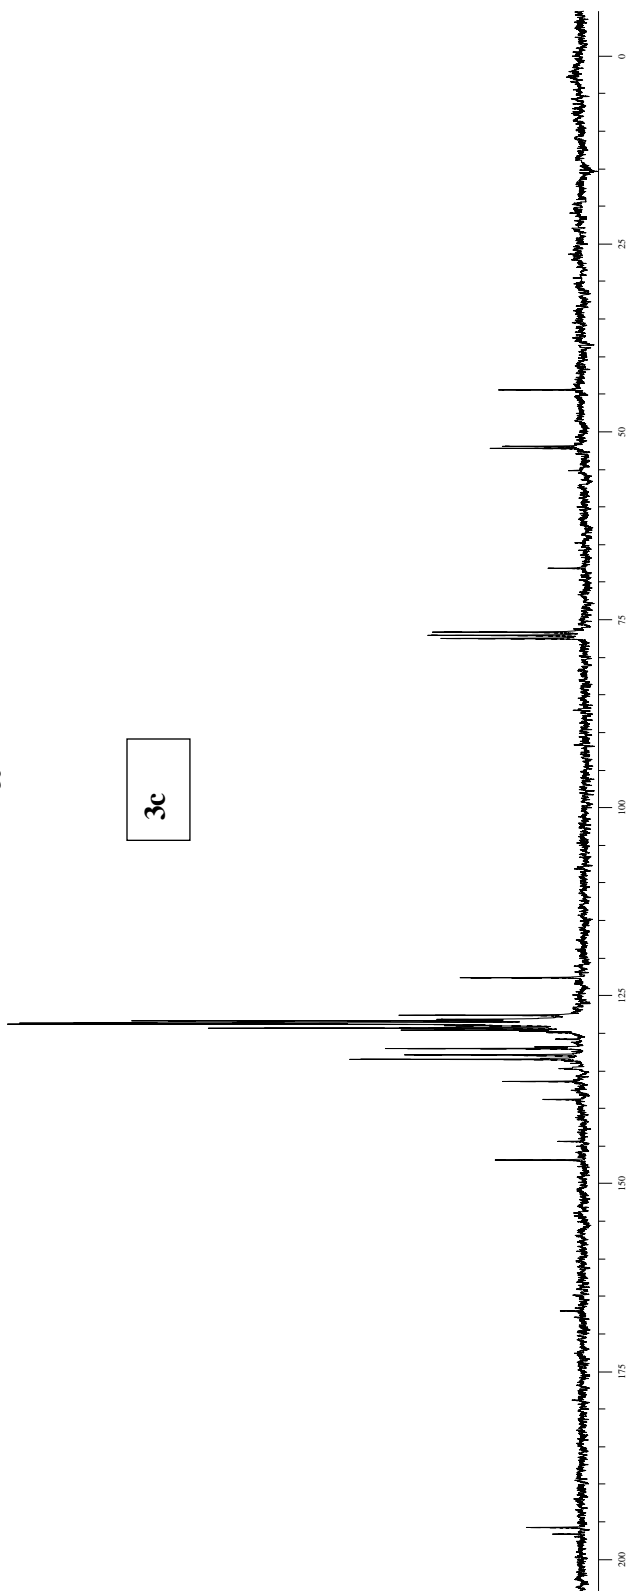

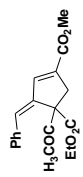

3d

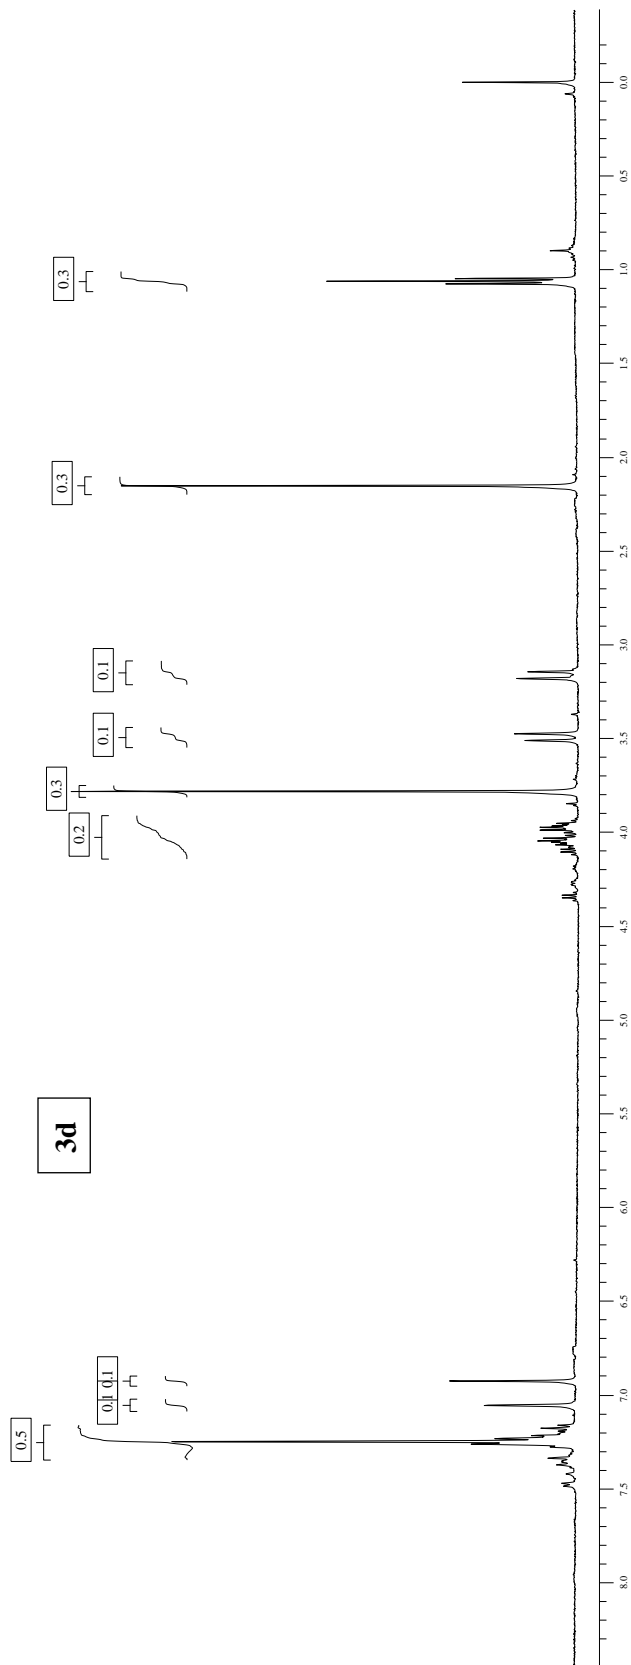



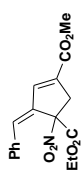

**3e**

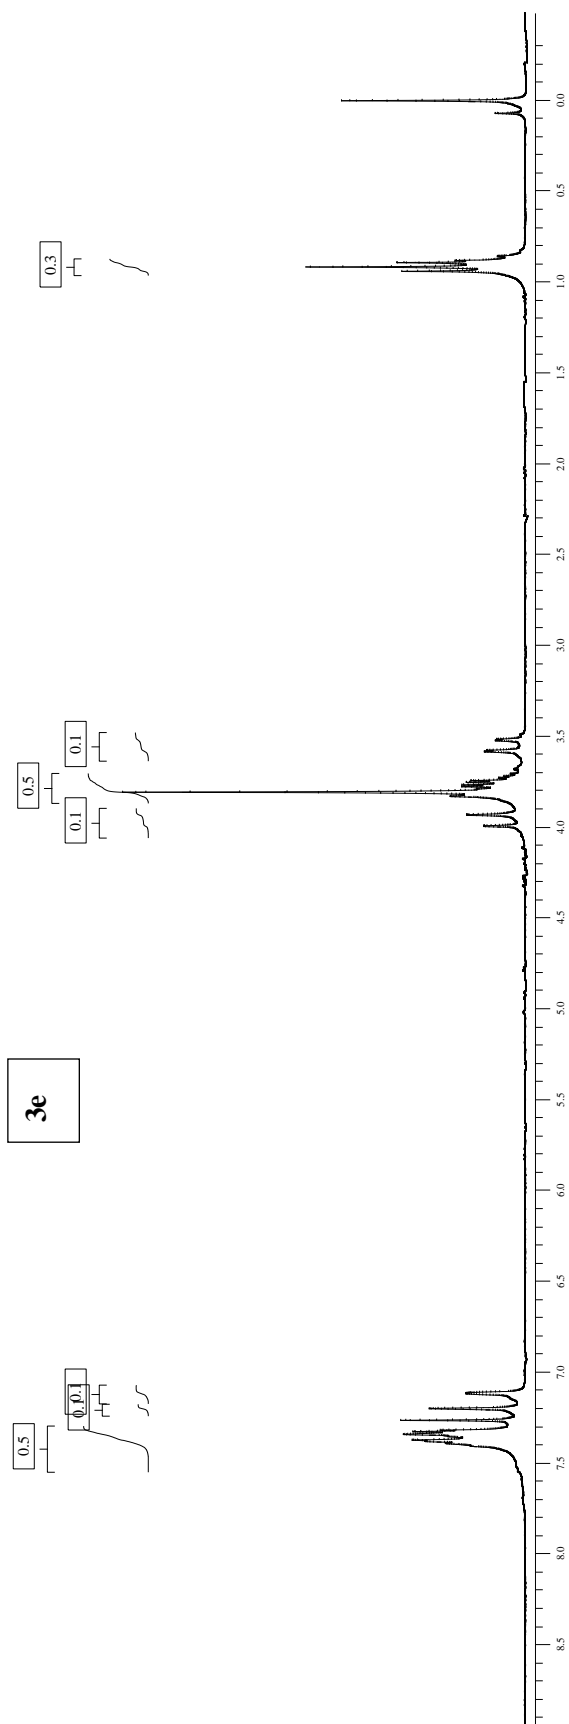

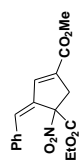

3e

3e

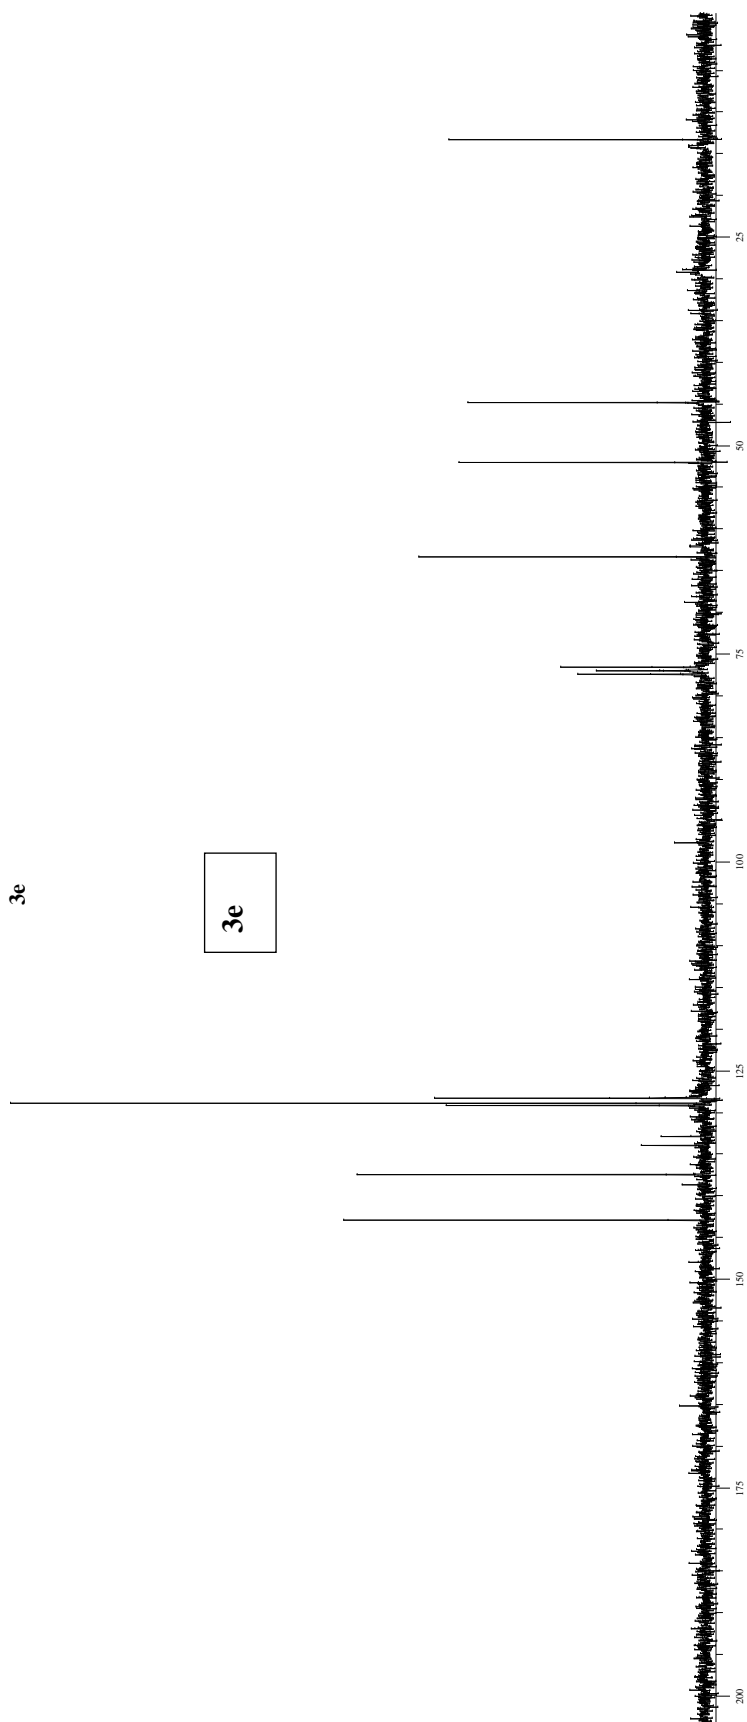

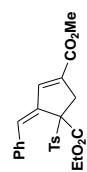

**3f**

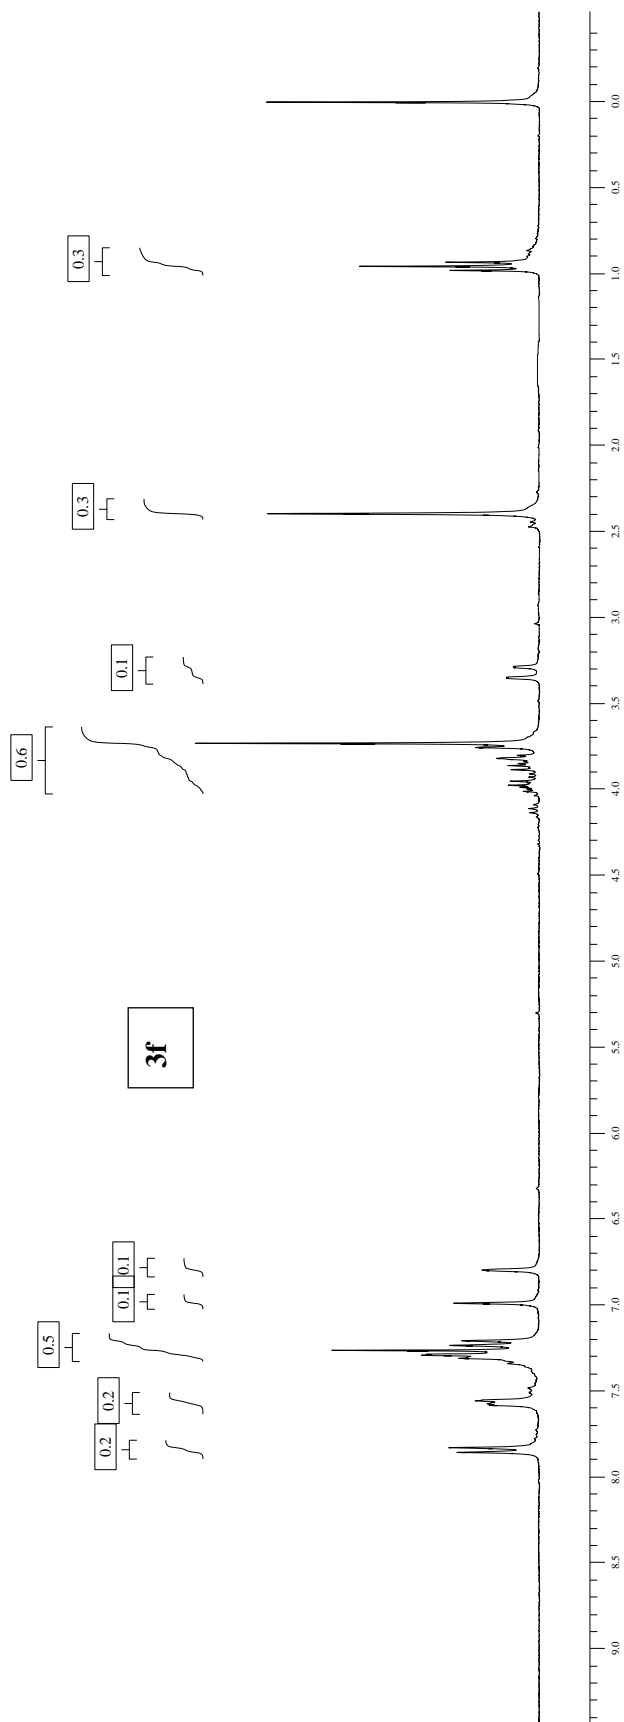

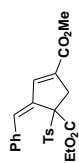

**3f**

**3f**

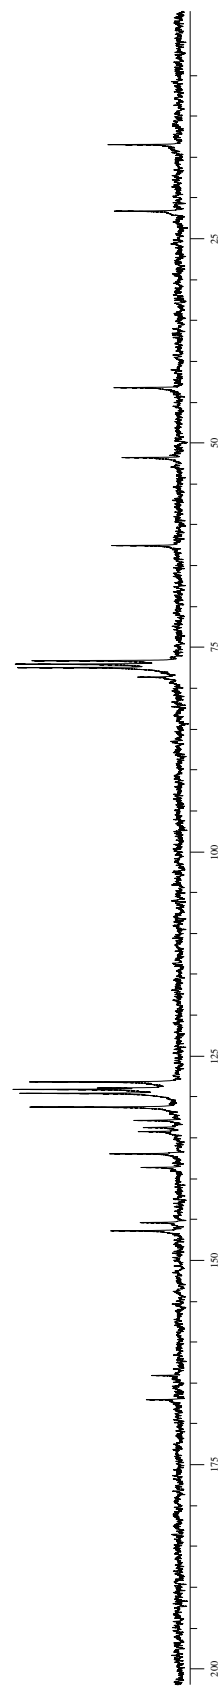

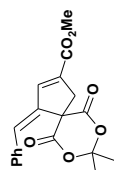

3g

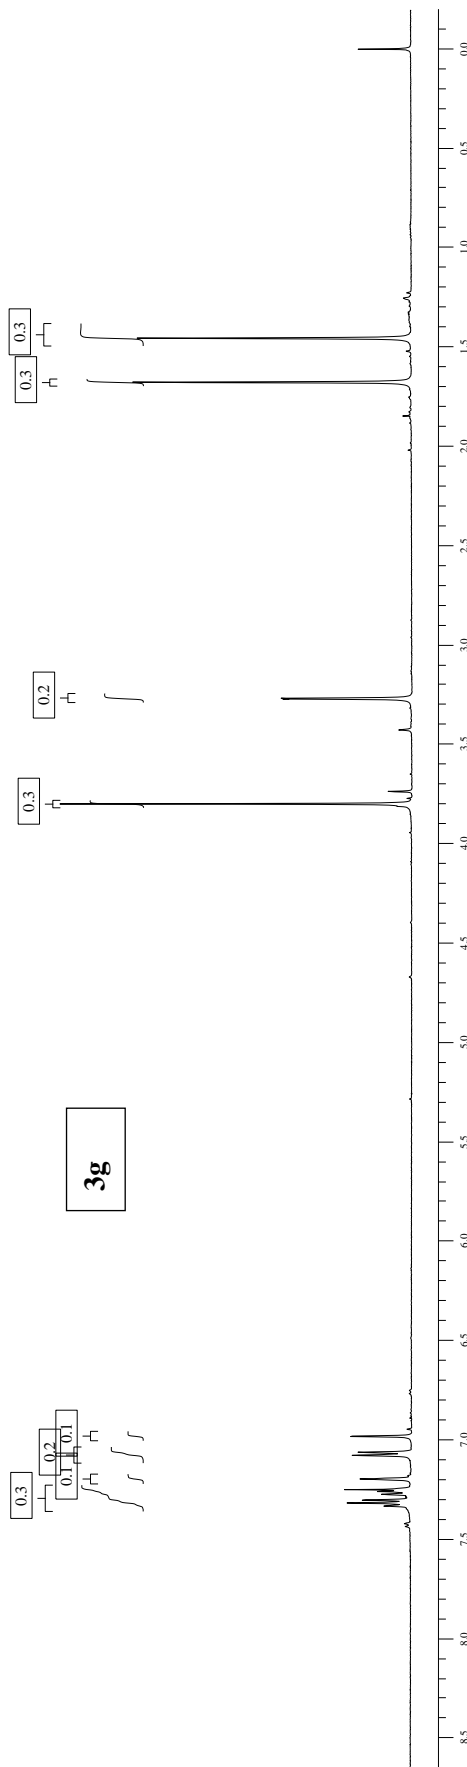



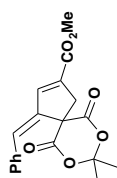

3 g

3 g

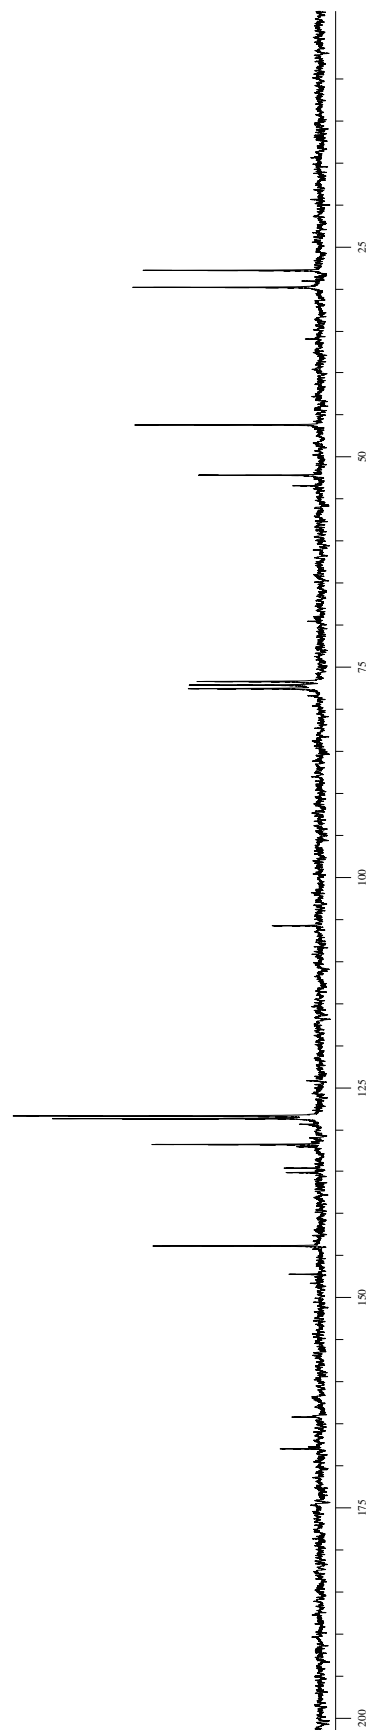

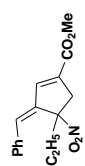

3h

3h

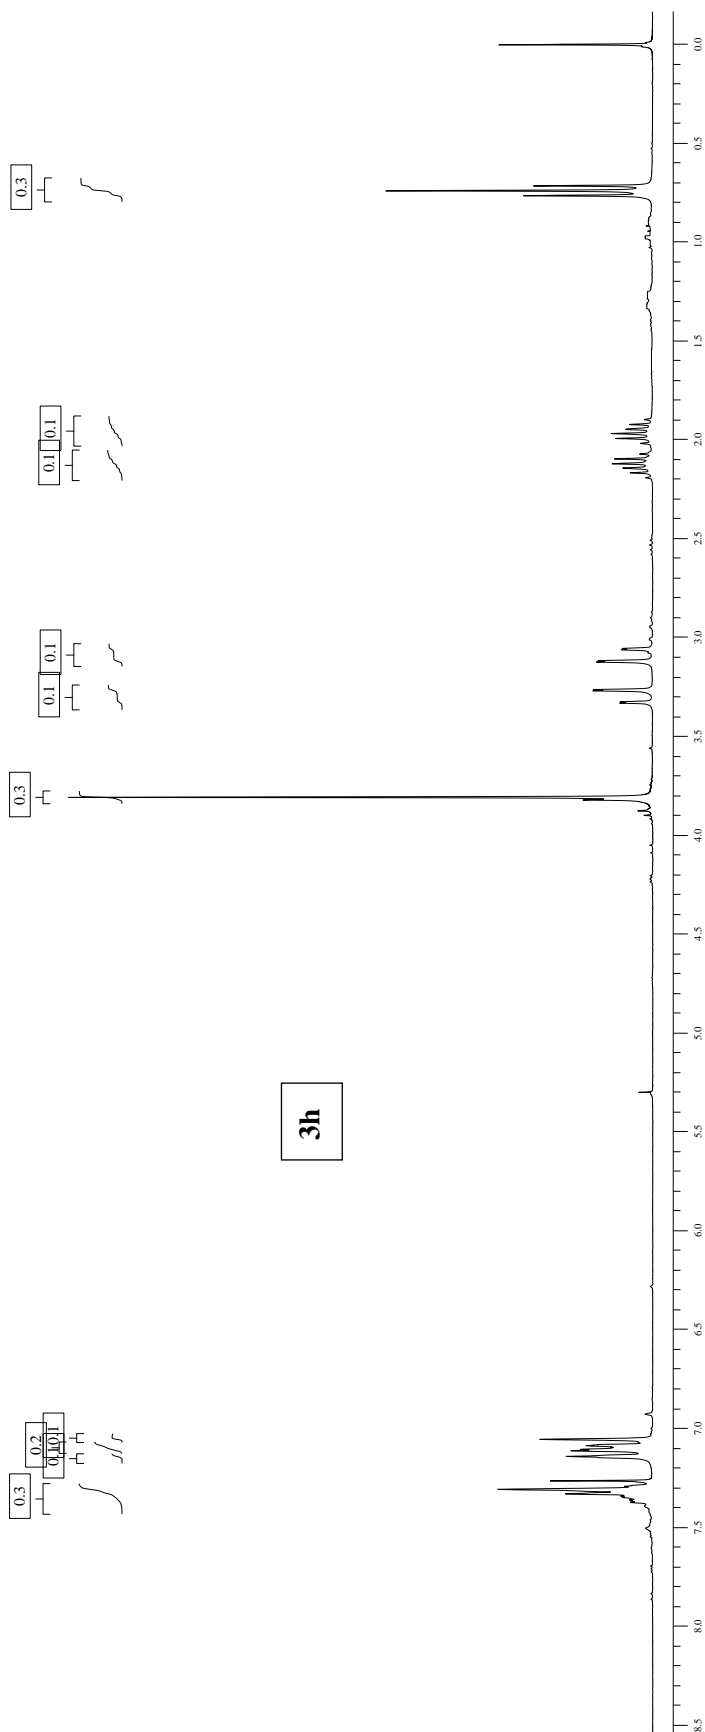

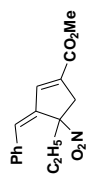

3h

3h

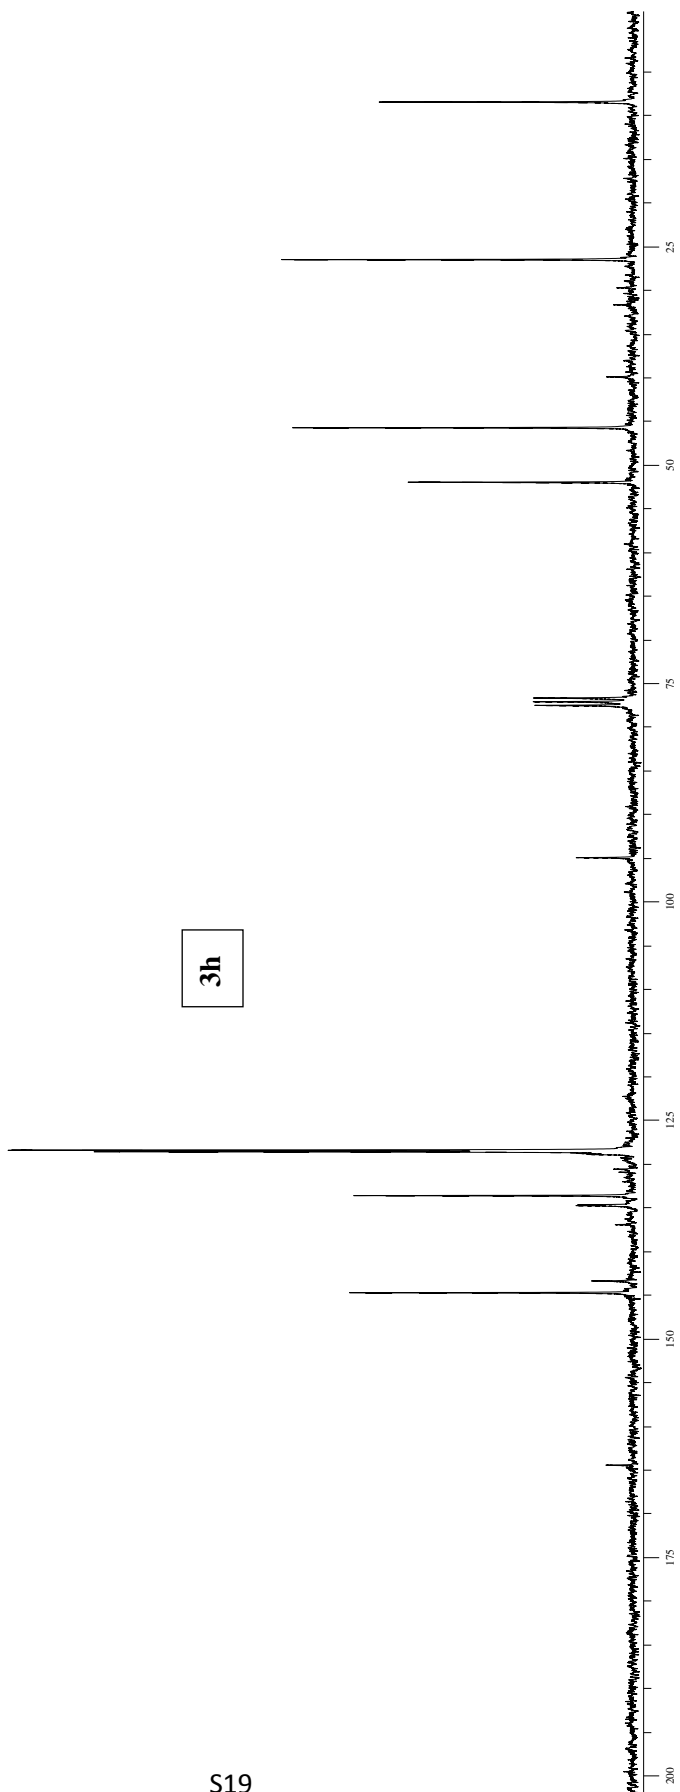

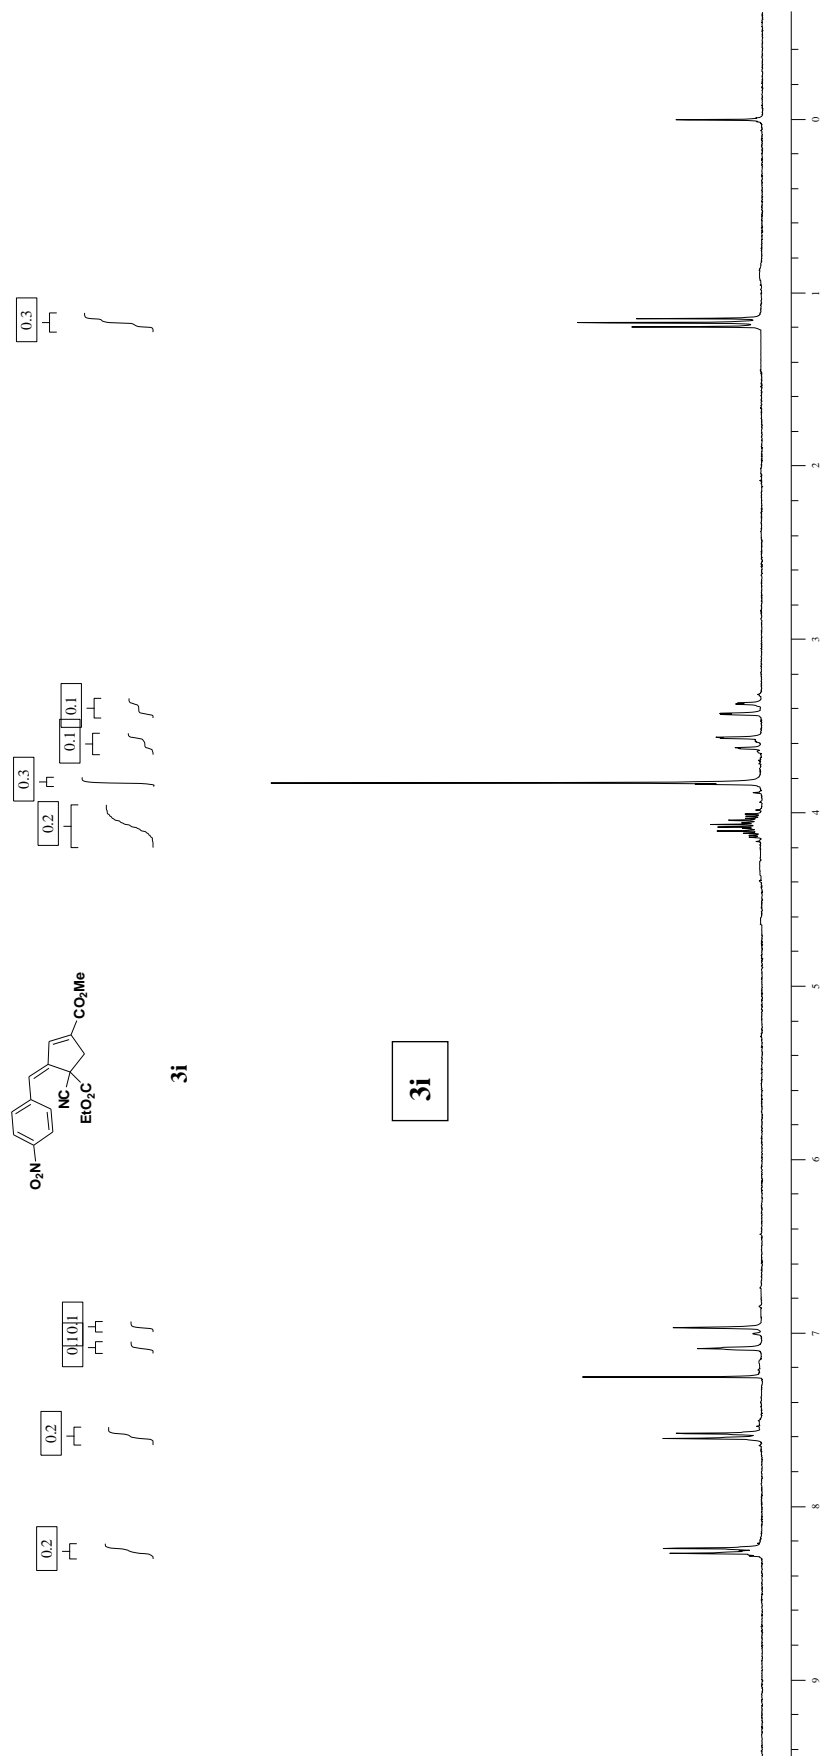

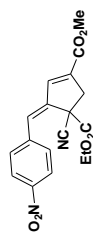

**3i**

**3i**

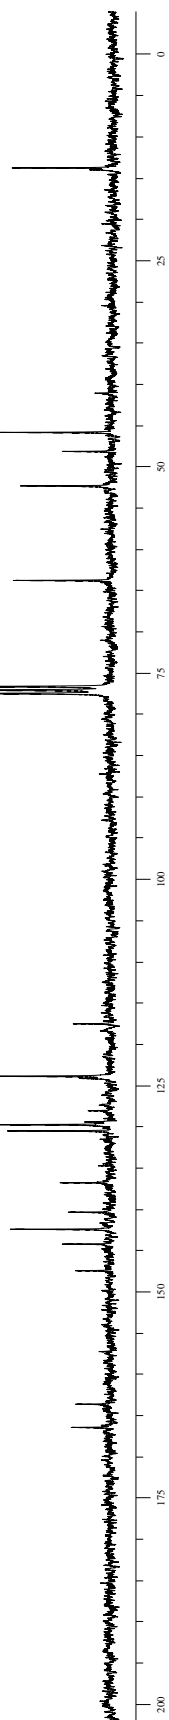

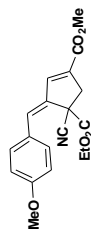

3j

3j

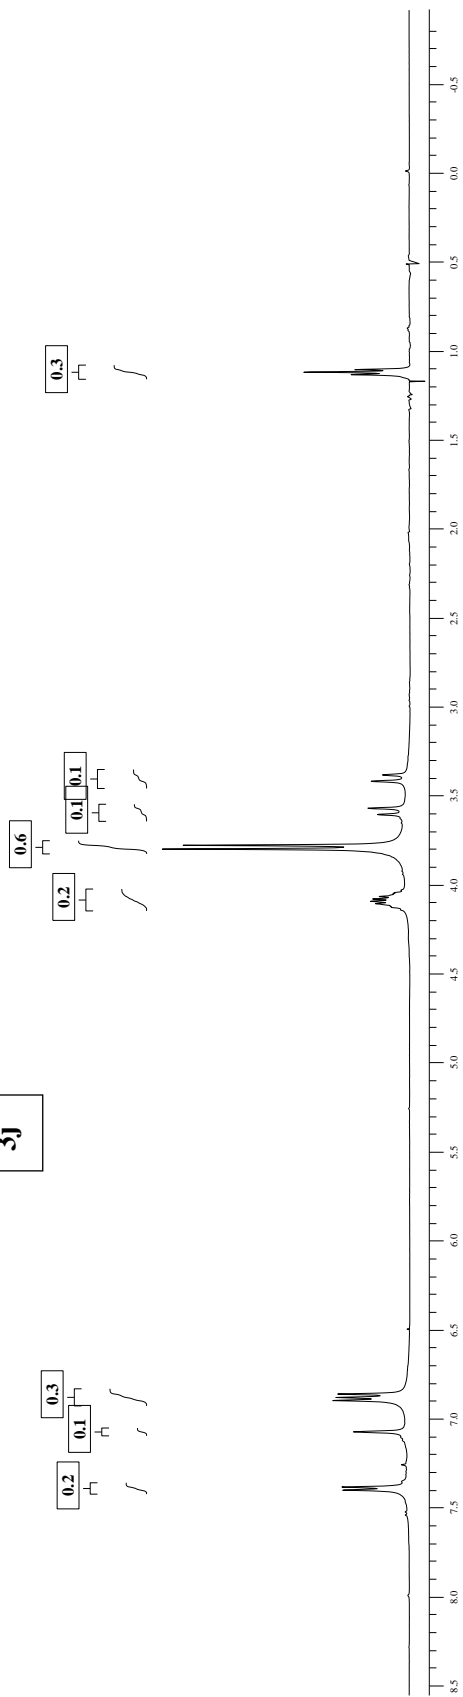

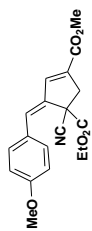

3i

3j

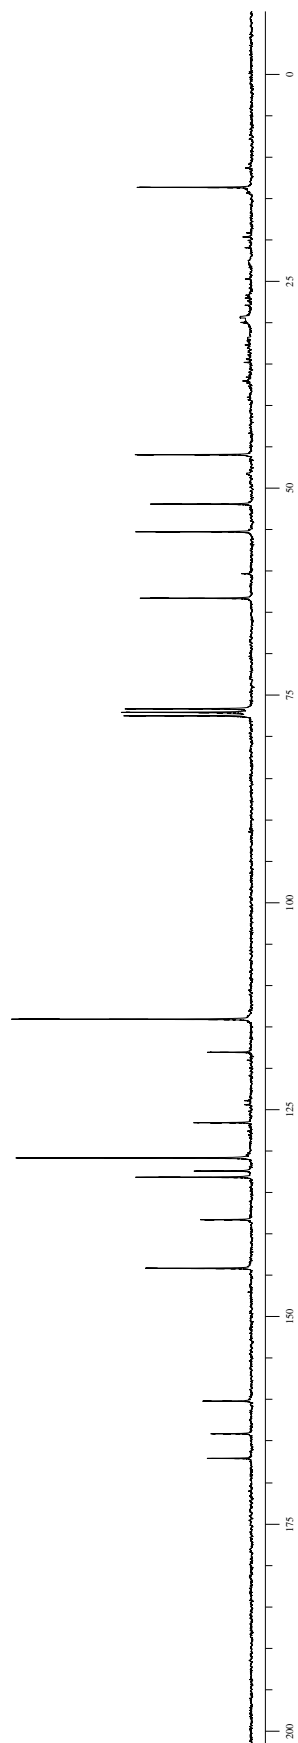





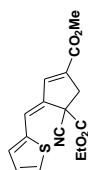

3k

3k

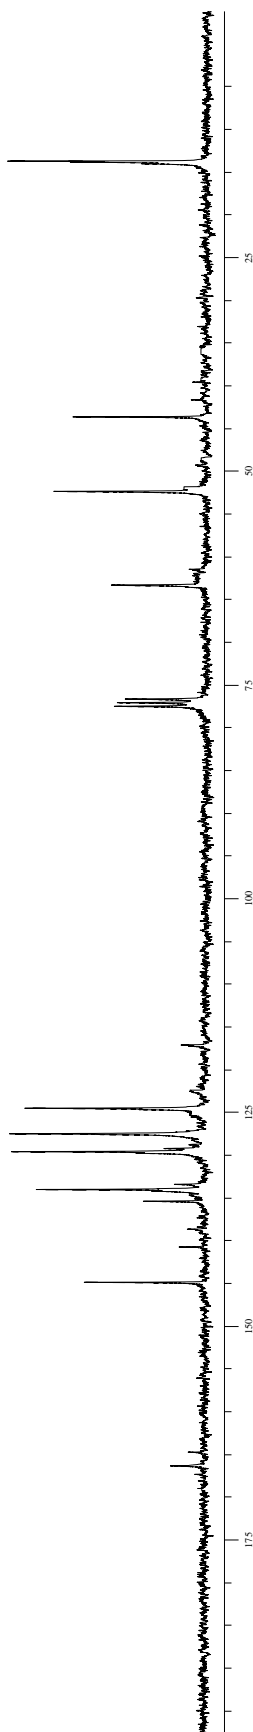

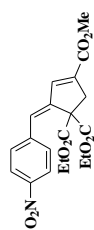

31

31

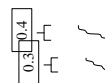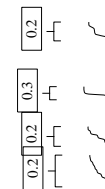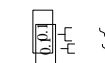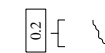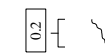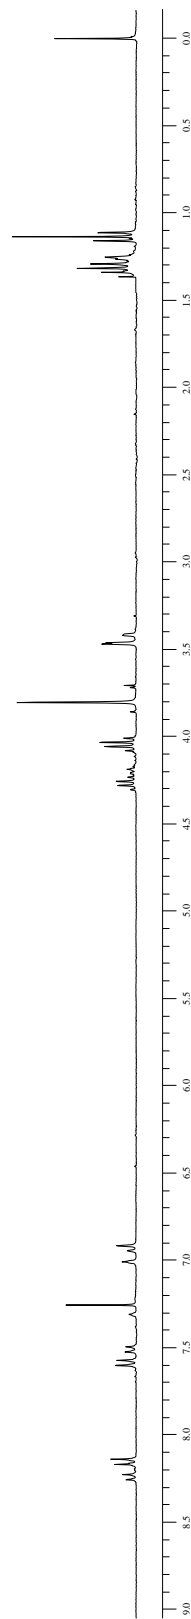

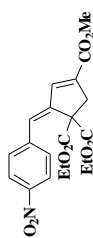

**3I**

**3I**

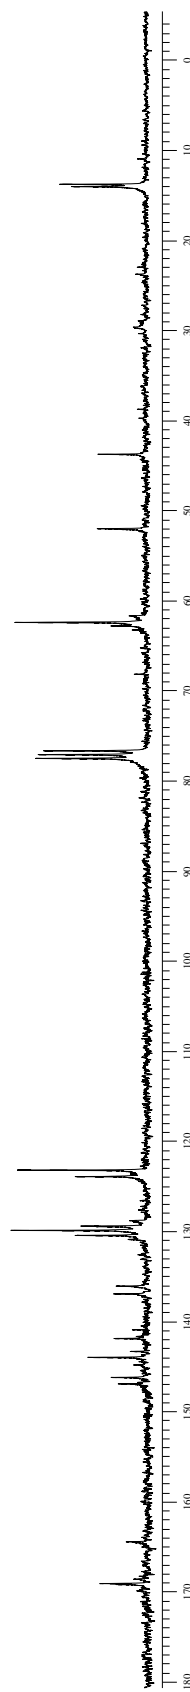

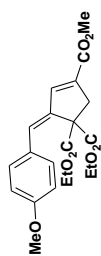

3m

S28

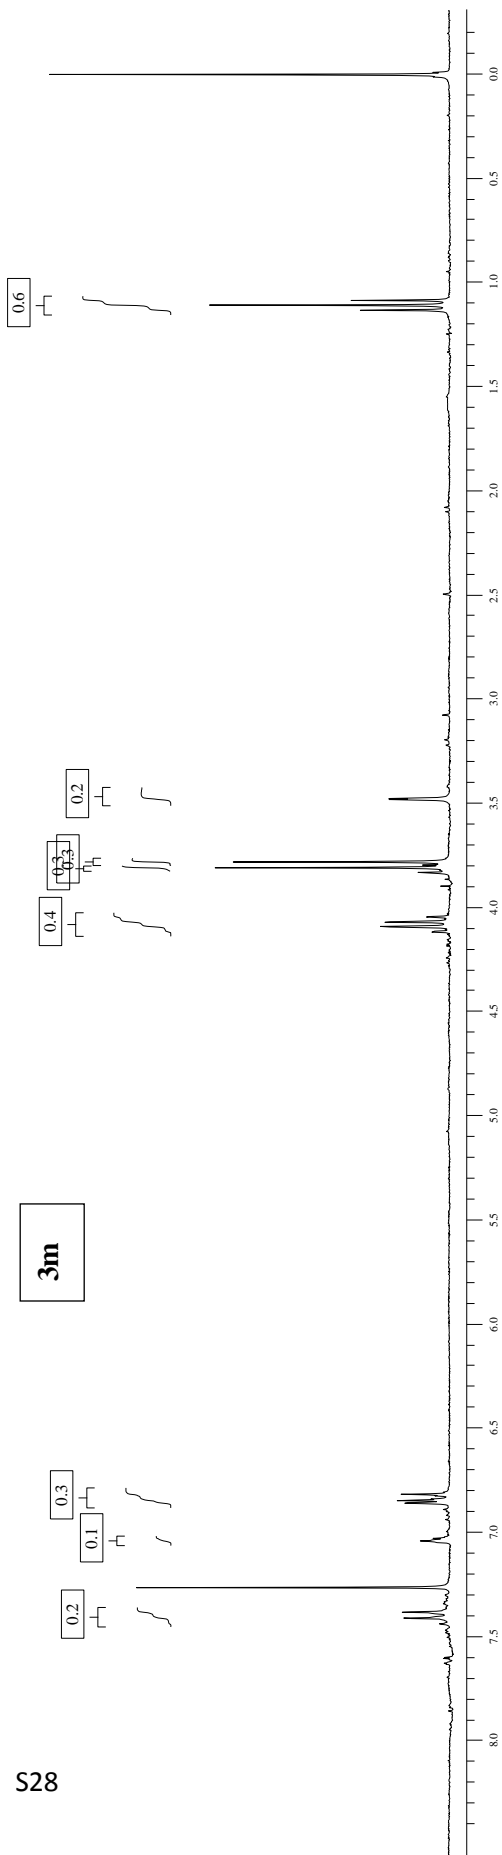

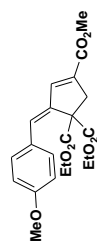

**3m**

**3m**

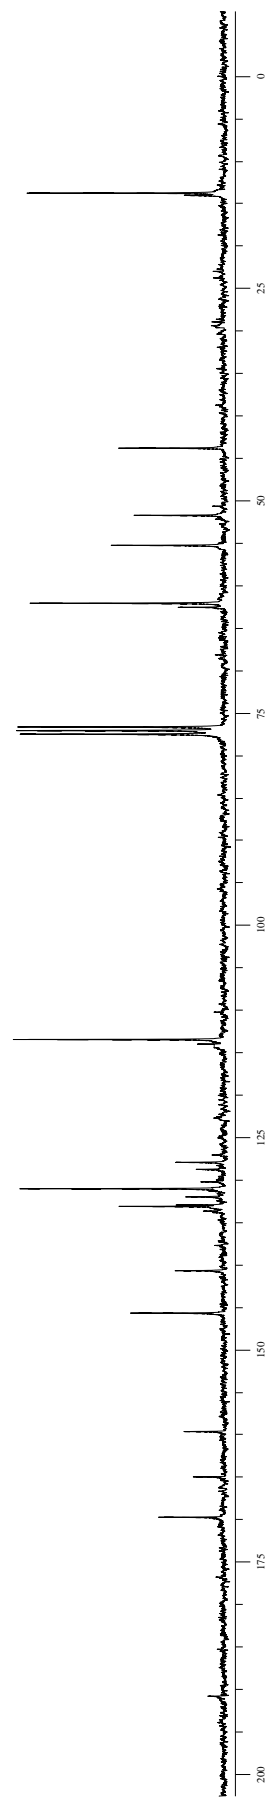

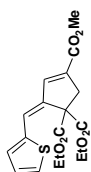

3p

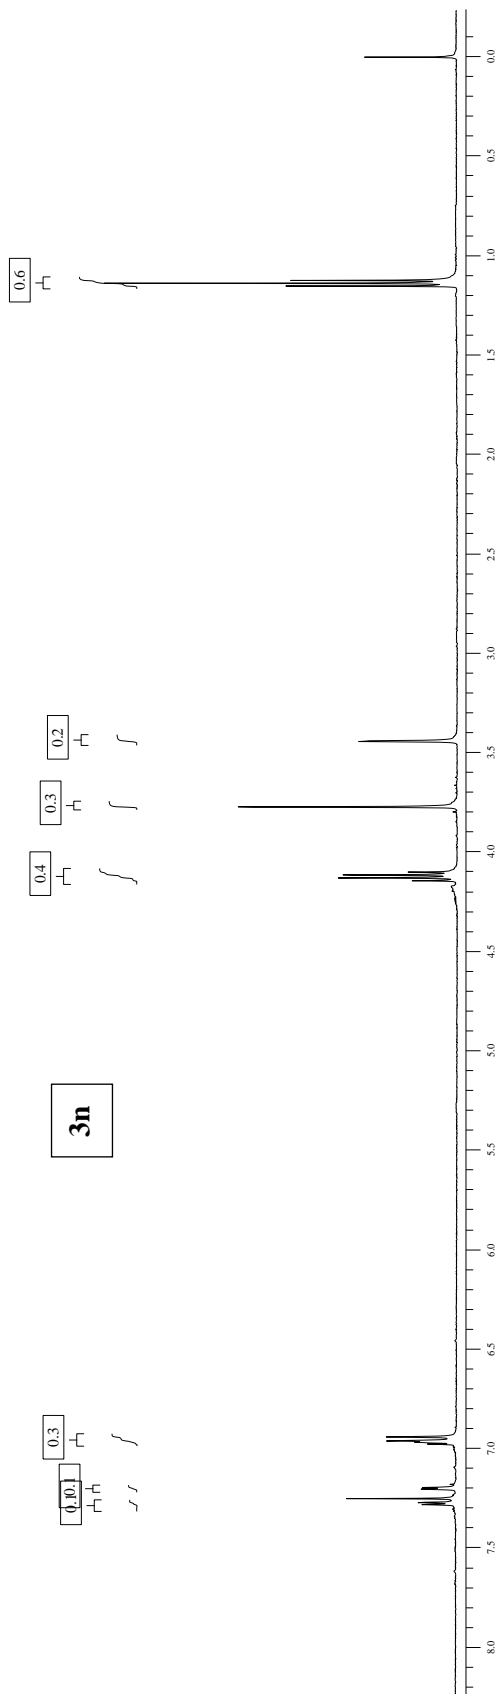

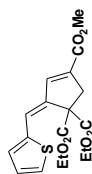

3p

3n

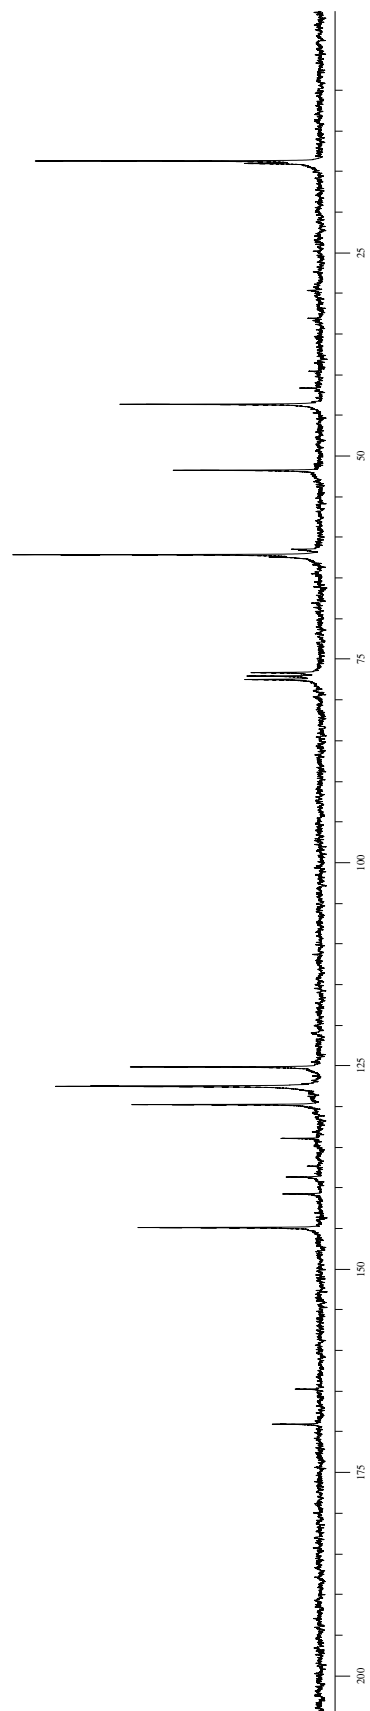

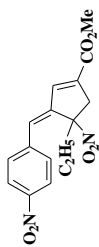

30

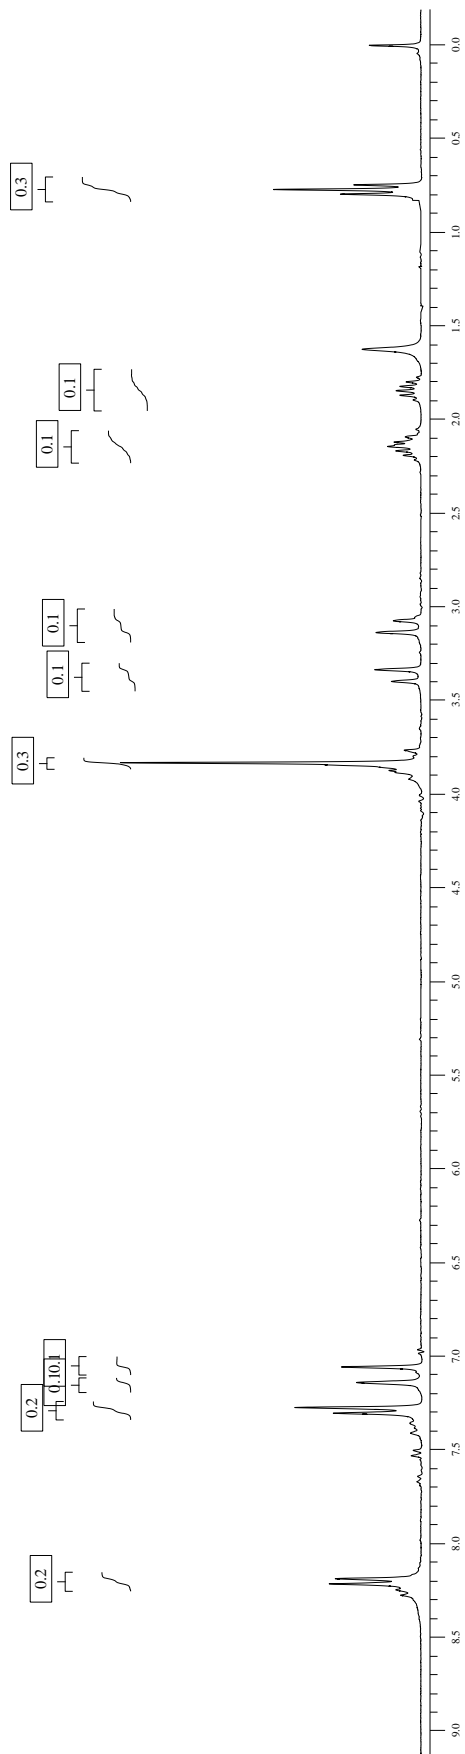



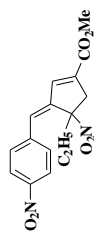

30

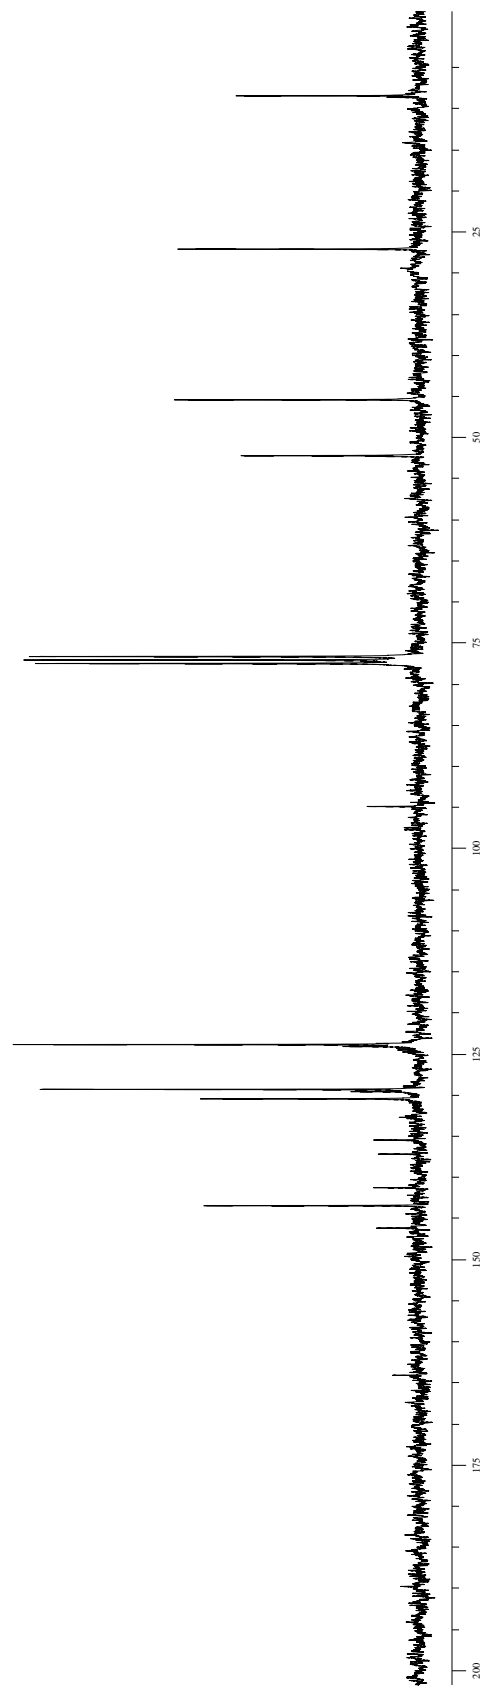

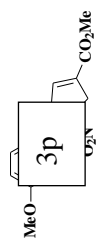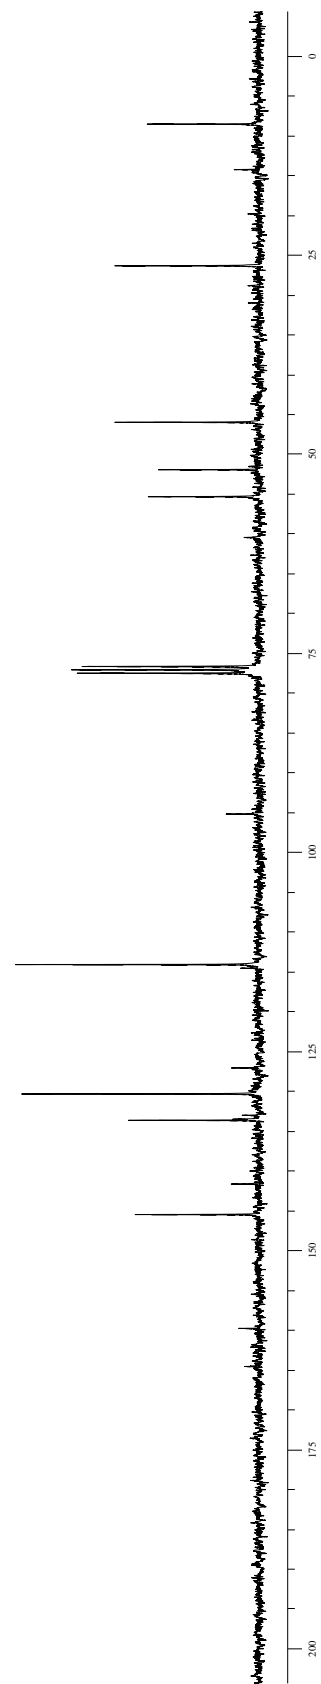

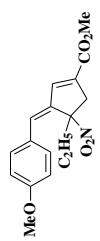

**3p**

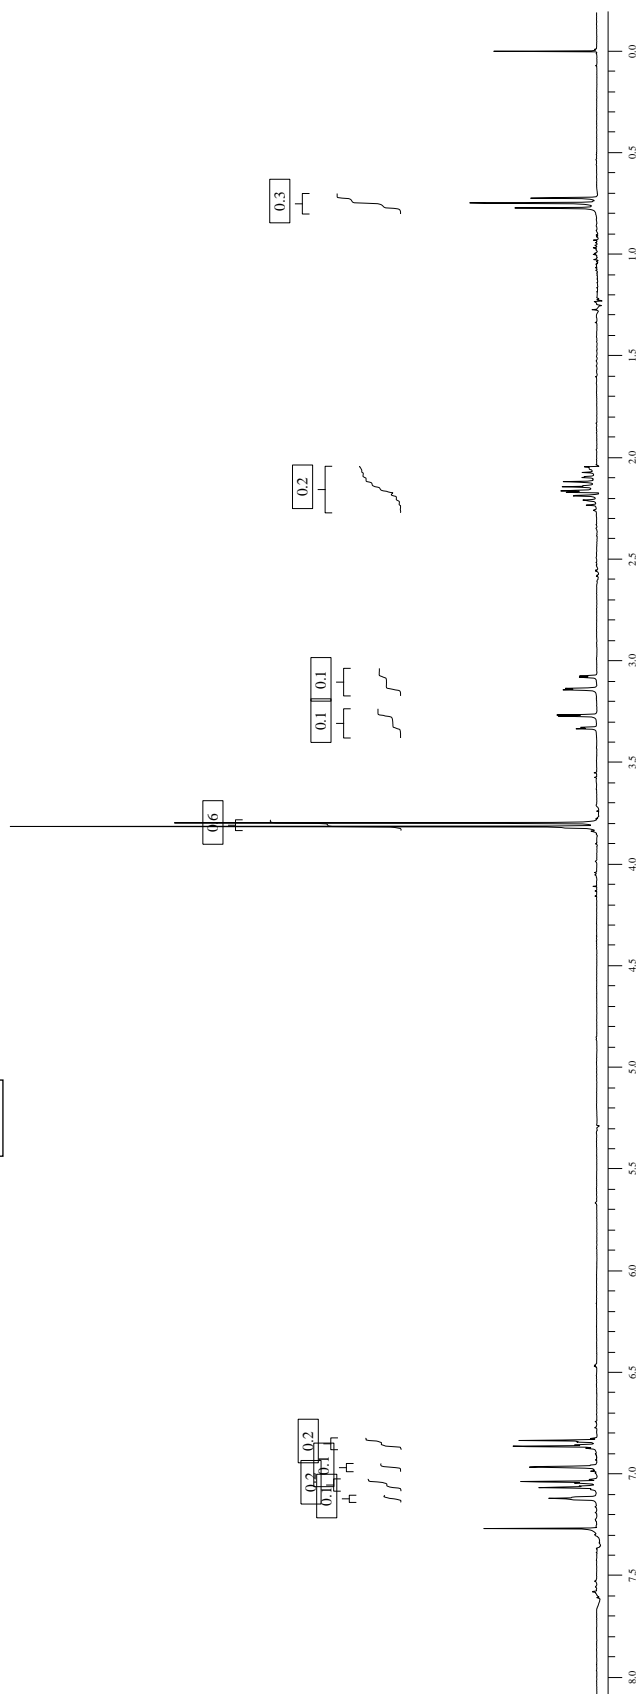

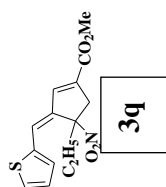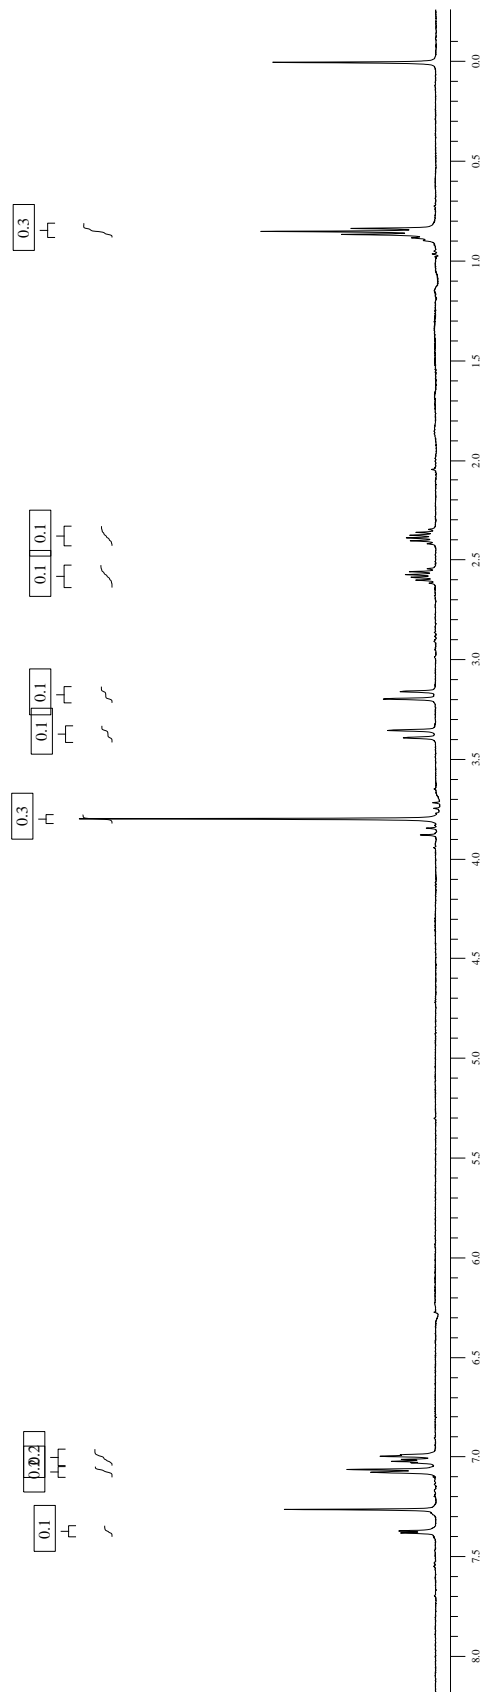

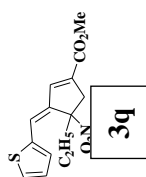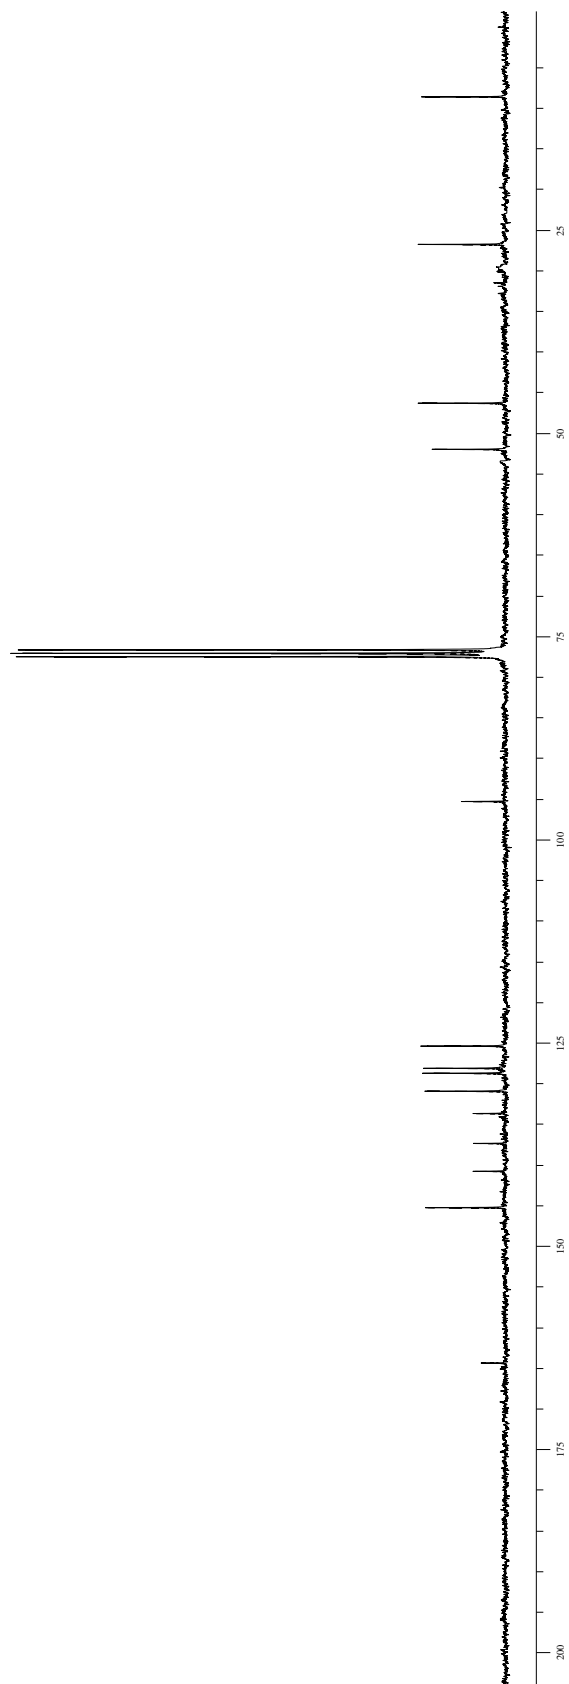

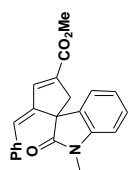

**3r**

**3r**

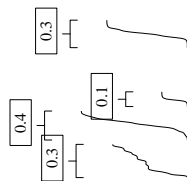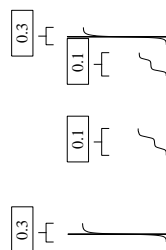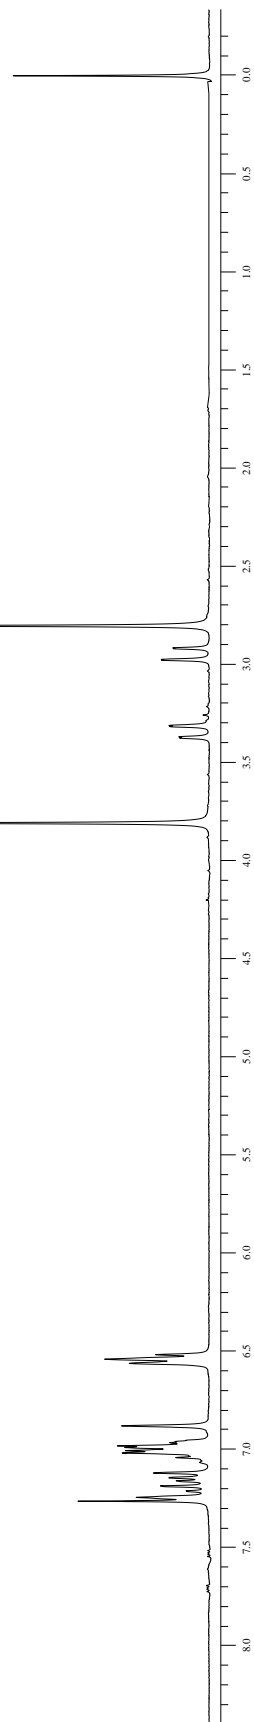

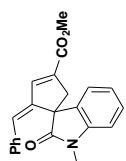

**3r**

**3r**

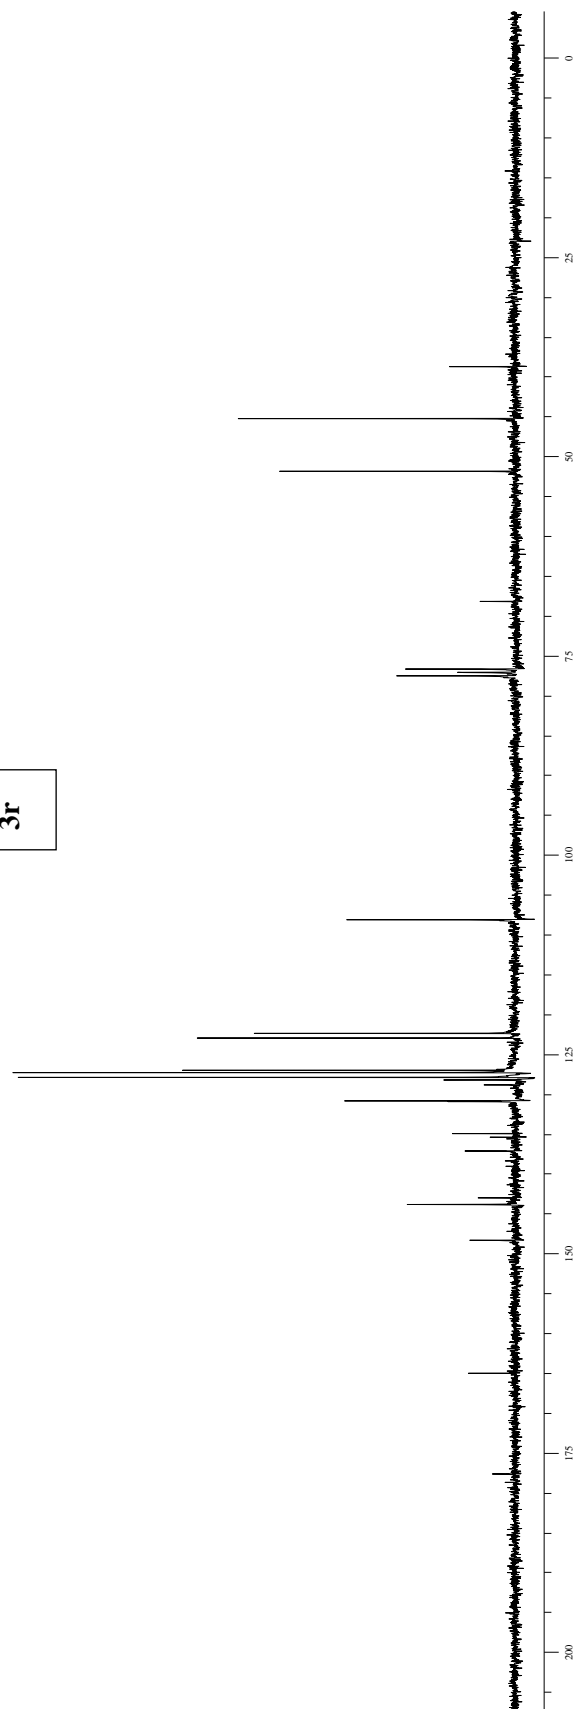

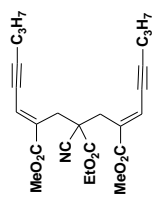

4a

4a

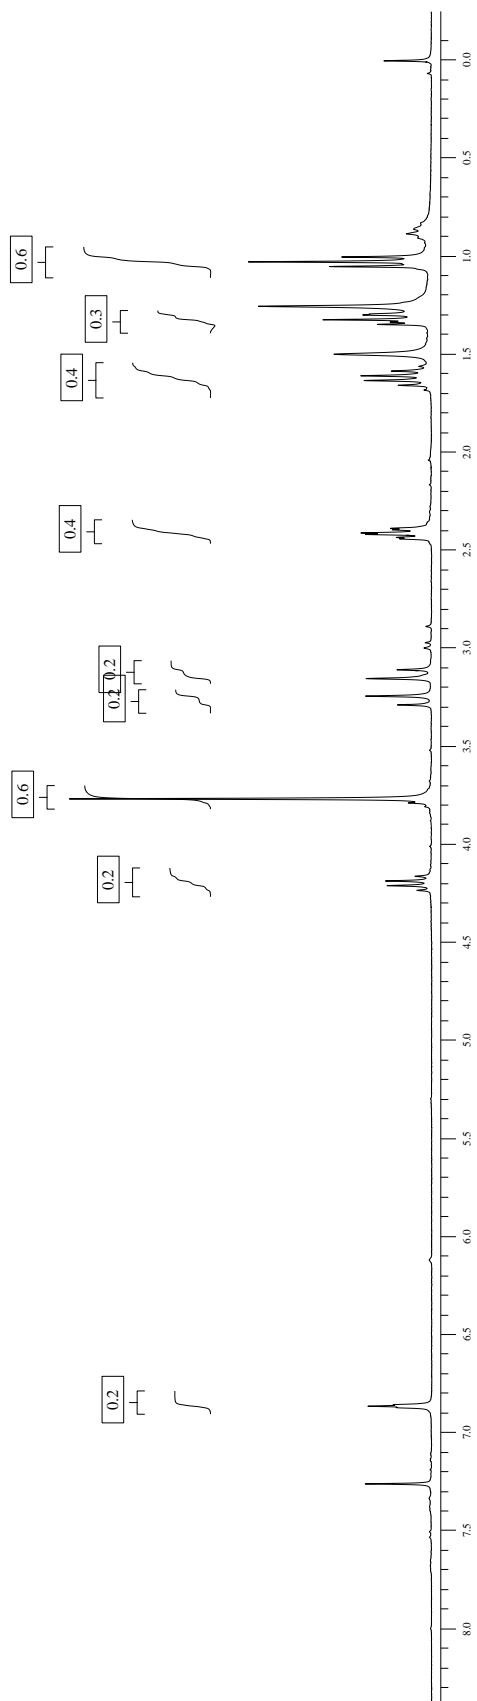



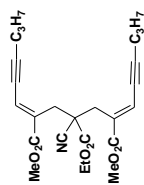

4a

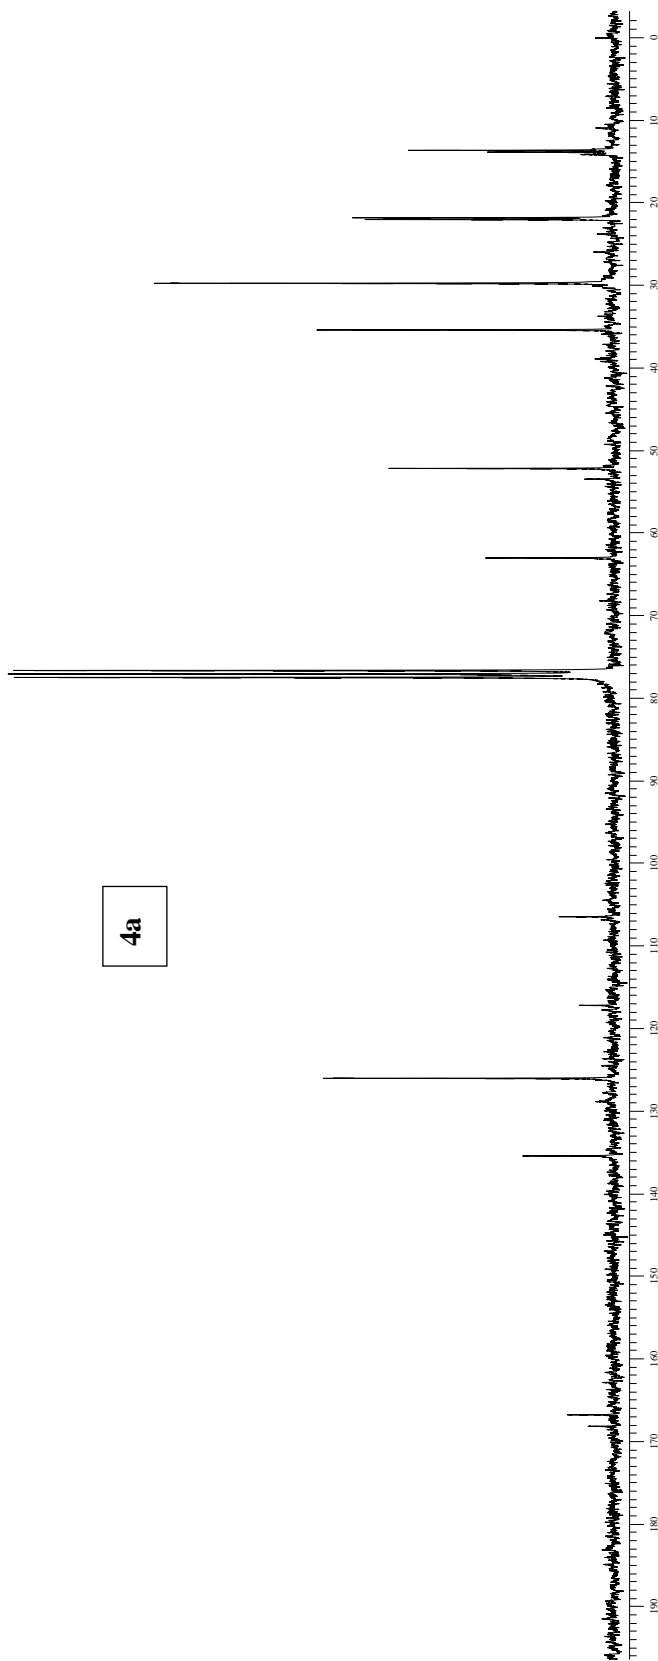

Supplement: c2ob26934a.pdf [file c2ob26934a.pdf]
